# Supplementary material for: The Landscape of Host Transcriptional Response Programs Commonly Perturbed by Bacterial Pathogens: Towards Host-Oriented Broad-Spectrum Drug Targets
Source: PubMed Central journal article supplement (PMC3596304; doi:10.1371/journal.pone.0058553), 2013-03-13
Supplement: pone.0058553.s001.pdf [file pone.0058553.s001.pdf]

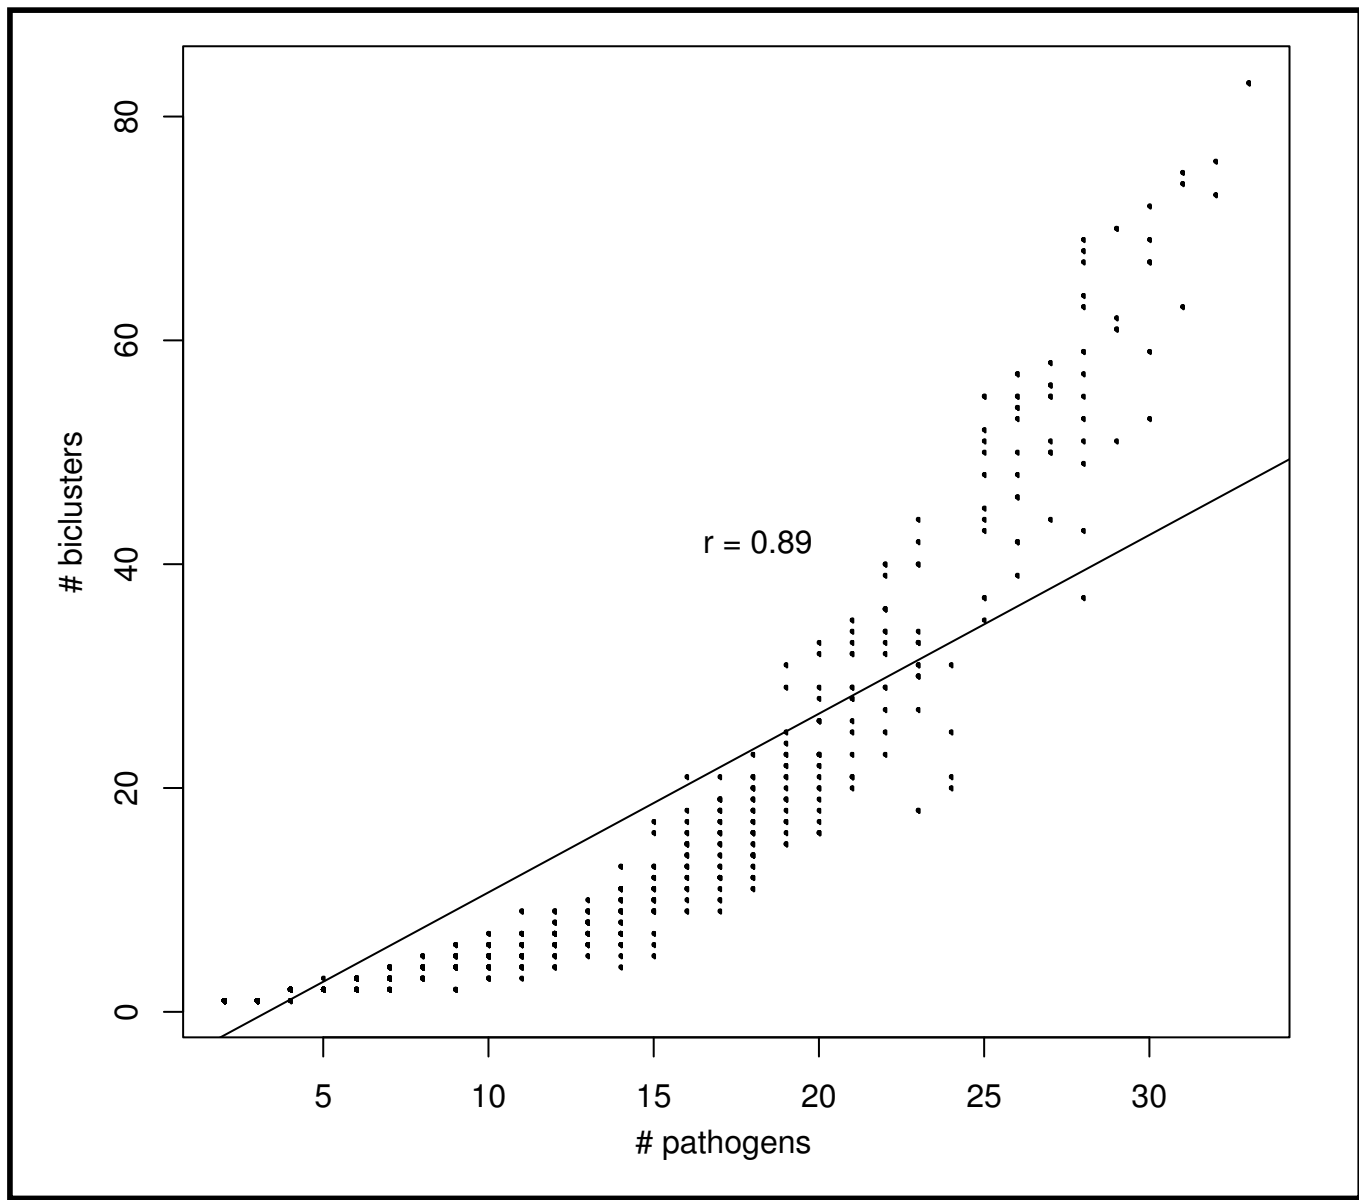

**Figure S1. Correlation between number of pathogens that perturb gene set and the number of biclusters that contain the gene set.** Plot indicates that number of pathogens perturbing a gene set are positively correlated with the number of biclusters a particular gene set appeared in.
