# Supplementary material for: The Landscape of Host Transcriptional Response Programs Commonly Perturbed by Bacterial Pathogens: Towards Host-Oriented Broad-Spectrum Drug Targets
Source: PLoS One. 2013 Mar 13;8(3):e58553. doi: 10.1371/journal.pone.0058553 (PMC3596304; doi:10.1371/journal.pone.0058553)
Supplement: Table S4 — Known anti-infective targets in biclusters. It contains bicluster ID, list of all drug targets, and anti-infective targets in bicluster. (XLS) [file pone.0058553.s005.xls]

## Sheet: Sheet1
BiclusterId	#DrugTarget	#AntiInfectiveDrugTarget	DrugTargets	AntiInfectiveDrugTargets	AntiInfectiveDrugs	Pathogens
0	389	58	MSRA, CD44, ANXA2, HCK, PCCA, GOT2, SDHC, CXCL10, P4HA1, NDUFS6, MEFV, XDH, GPR109A, PLG, FECH, PDHA1, NDUFS2, DHRS4, SERPINE1, SLC25A10, DECR1, CXCR4, SLC25A22, GLTP, ARG2, PKM2, MTHFD1, MCCC1, GLS, ASGR2, SERPINB2, VCAM1, SLC1A3, PLAU, ADCY7, CCL5, ALDH1L1, GP1BA, GLUD1, ACSS1, ADRBK1, ANXA1, PDGFRB, IFNGR1, HMOX1, ADRB1, ME2, HPD, ALDH6A1, SLC25A13, RENBP, CTSS, C1QC, TNF, TGFBR2, LCK, RAF1, N…	CA2, TLR7, PON1, MGMT, CA3, CD44, CBS, CYSLTR2, TOP2A, P2RY2, P4HA1, GAMT, PLG, C1QA, PTGS1, FCGR3A, SERPINC1, F10, DHRS4, SERPINE1, IL1B, GP9, PAH, ICAM1, CSAD, CASP1, CXCR4, NFS1, ALDH1A1, ARG2, CCR5, SLC25A15, DHODH, PHYH, RBP1, CYSLTR1, OTC, P4HB, F2, SLC7A1, CD55, MPO, C1QB, ANXA1, SELP, MMP9, ADRB1, FPR1, ALDH2, TLR8, AR, ADRB2, PLOD2, ADH1A, GATM, C1QC, TNF, PLAUR	Methazolamide, Acetazolamide, Dorzolamide, Dichlorphenamide, Brinzolamide, Imiquimod, Hydroxychloroquine, Cefazolin, L-Cysteine, Hyaluronan, L-Cysteine, Nedocromil, Suramin, Vitamin C, Guanidine, Alteplase, Palivizumab, Salicylate-sodium, Antipyrine, Diclofenac, Diethylcarbamazine, Piroxicam, Ketorolac, Nepafenac, Flurbiprofen, Intravenous Immunoglobulin, Palivizumab, Heparin, Heparin, Vitamin A,…	ehrlichia_chaffeensis_arkansa, ehrlichia_chaffeensis_wakulla
2	10	2	PLA2G4A, JAK2, TAP1, CD40, IL6, ISG20, CXCL10, IL1R1, TNF, PLAUR	TNF, PLAUR	Chloroquine, Alteplase	yersinia_enterocolitica_wap_bl6, yersinia_enterocolitica_wap_bc, yersinia_enterocolitica_p60_bl6, yersinia_enterocolitica_p60_bc, listeria_monocytogenes, ehrlichia_chaffeensis_arkansa, ehrlichia_chaffeensis_wakulla, mycobacterium_tuberculosis, escherichia_coli
4	7	1	NFKB1, IL6, CCL20, ISG20, CCL2, CD40, PLAUR	PLAUR	Alteplase	yersinia_enterocolitica_wap_bc, helicobacter_pylori_kx1_mgep, pseudomonas_aeruginosa, ehrlichia_chaffeensis_wakulla, pseudomonas_aeruginosa_fdr440, mycobacterium_tuberculosis, helicobacter_pylori_kx2_mgep, escherichia_coli
12	6	2	IL6, CCL20, PTGS2, JUN, F3, PLAUR	PTGS2, PLAUR	Salicylate-sodium, Antipyrine, Diclofenac, Piroxicam, Ketorolac, Aminosalicylic Acid, Flurbiprofen, Nepafenac, Alteplase	yersinia_enterocolitica_wap_bc, helicobacter_pylori_kx1_mgep, yersinia_enterocolitica_p60_bl6, yersinia_enterocolitica_p60_bc, listeria_monocytogenes, streptococcus_pneumoniae_tigr4, helicobacter_pylori_kx2_mgep, shigella_dysenteriae
18	18	3	MMP13, SMOX, LCK, CCL2, MDM2, CD40, SLC7A11, GCH1, CCL5, ISG20, CD86, NFKB1, TAP1, IL6, SLC7A2, PTGS2, TNF, HSPA1A	SLC7A2, PTGS2, TNF	L-Ornithine, Salicylate-sodium, Antipyrine, Diclofenac, Piroxicam, Ketorolac, Aminosalicylic Acid, Flurbiprofen, Nepafenac, Chloroquine	yersinia_enterocolitica_wap_bl6, yersinia_enterocolitica_wap_bc, yersinia_enterocolitica_p60_bl6, yersinia_enterocolitica_p60_bc, lactobacillus_acidophilus, bifidobacterium_bifidum, pseudomonas_aeruginosa
28	45	8	VDR, MMP12, BCAT1, CYP1B1, SLC7A11, GCH1, ISG20, SAT1, P2RY2, CXCL10, P4HA1, NFKB1, JAK2, GLRX, SLC22A4, GSK3B, PDGFRA, B4GALT4, HK1, CASP1, PLA2G4A, SMOX, UAP1, TNFRSF1B, SERPINB2, GLA, PPP2CA, SLC1A3, AMPD3, CD55, PIM1, TXNRD1, STAT1, ANXA1, ARF4, TAP1, NP, TOP1, BMP2, SGPL1, ANPEP, IL6, PTGS2, P4HA2, PLAUR	P4HA1, ANXA1, TOP1, PTGS2, CASP1, CD55, P2RY2, PLAUR	Vitamin C, Hydrocortisone, Dexamethasone, Sodium stibogluconate, Salicylate-sodium, Antipyrine, Diclofenac, Piroxicam, Ketorolac, Aminosalicylic Acid, Flurbiprofen, Nepafenac, Minocycline, Chloramphenicol, Suramin, Alteplase	yersinia_enterocolitica_wap_bc, streptococcus_pneumoniae_g54, listeria_monocytogenes
30	14	4	PLA2G4A, TLR7, LCK, CCL2, TAP1, CD40, TNFRSF1B, IL1B, CASP1, CCL5, ISG20, CD86, SAT1, TNF	TLR7, IL1B, CASP1, TNF	Imiquimod, Hydroxychloroquine, Minocycline, Minocycline, Chloroquine	yersinia_enterocolitica_wap_bc, ehrlichia_chaffeensis_arkansa, yersinia_enterocolitica_p60_bc, ehrlichia_chaffeensis_wakulla, lactobacillus_acidophilus, streptococcus_pyogenes, ehrlichia_chaffeensis_liberty
32	1	1	PLAUR	PLAUR	Alteplase	yersinia_enterocolitica_wap_bc, ehrlichia_chaffeensis_arkansa, ehrlichia_chaffeensis_wakulla, streptococcus_pneumoniae_g54, mycobacterium_tuberculosis, streptococcus_pneumoniae_tigr4, shigella_dysenteriae
34	53	9	MMP13, MMP12, NDUFA3, NDUFB8, ACE2, CYP1B1, SLC7A11, GCH1, ISG20, EDNRB, SAT1, CD86, P2RY2, CXCL10, P4HA1, NFKB1, JAK2, WEE1, PPARG, GSK3B, NDUFAB1, HK1, NDUFC1, PLA2G4A, NDUFA13, SMOX, UAP1, BCL2, TNFRSF1B, SERPINB2, GLA, PARK7, PIM1, CD55, NDUFA2, TXNRD1, CDK6, ANXA1, NDUFA9, ARF4, CHD1, TAP1, NR3C1, NP, TOP1, IFNGR2, BMP2, GJA1, IL6, PTGS2, P4HA2, PLAUR, CARS	P4HA1, ANXA1, NR3C1, TOP1, PTGS2, CD55, P2RY2, CARS, PLAUR	Vitamin C, Hydrocortisone, Dexamethasone, Desonide, Hydrocortisone, Loteprednol, Fluorometholone, Dexamethasone, Fluocinolone Acetonide, Triamcinolone, Medrysone, Rimexolone, Prednisolone, Alclometasone, Betamethasone, Sodium stibogluconate, Salicylate-sodium, Antipyrine, Diclofenac, Piroxicam, Ketorolac, Aminosalicylic Acid, Flurbiprofen, Nepafenac, Chloramphenicol, Suramin, L-Cysteine, Alteplase	yersinia_enterocolitica_p60_bl6, yersinia_enterocolitica_p60_bc, streptococcus_pneumoniae_g54
36	36	9	TLR7, LCK, ANXA2, HCK, SLC7A11, ISG20, SAT1, CD86, CXCL10, P4HA1, MCM6, IL1B, CASP1, PLA2G4A, JUN, CCL2, CD40, TNFRSF1B, CD80, PROCR, SLC1A3, CCL5, STAT1, IL12B, SLC16A3, HMOX1, FPR1, HSPA1B, TAP1, IFNGR2, HTR2B, IL6, PLOD2, PTGS2, HSPA1A, TNF	P4HA1, TLR7, PTGS2, PLOD2, IL1B, FPR1, CASP1, TOP2A, TNF	Vitamin C, Imiquimod, Hydroxychloroquine, Salicylate-sodium, Antipyrine, Diclofenac, Piroxicam, Ketorolac, Aminosalicylic Acid, Flurbiprofen, Nepafenac, Vitamin C, Minocycline, Nedocromil, Minocycline, Chloroquine	ehrlichia_chaffeensis_arkansa, bifidobacterium_bifidum, mycobacterium_tuberculosis
38	25	5	MMP13, ALDH1A2, JUN, CD44, CCL2, CD40, SERPINB2, VCAM1, SLC7A11, GCH1, AMPD3, ISG20, CCL5, PIM1, CXCL10, BRAF, NFKB1, ABCC1, JAK2, SLC7A2, IL6, PTGS2, F3, IL1R1, PLAUR	SLC7A2, ALDH1A2, PTGS2, CD44, PLAUR	L-Ornithine, Vitamin A, Salicylate-sodium, Antipyrine, Diclofenac, Piroxicam, Ketorolac, Aminosalicylic Acid, Flurbiprofen, Nepafenac, Hyaluronan, Alteplase	yersinia_enterocolitica_wap_bl6, yersinia_enterocolitica_p60_bl6, helicobacter_pylori_kx2_mgep, escherichia_coli
40	17	3	CCL20, BCL2, CCL2, MDM2, TNFRSF1B, CYP1B1, GFPT2, SAT1, NFKB1, JAK2, CCL8, ITGB3, IL6, IL1B, IL1R1, PLAUR, TNF	IL1B, TNF, PLAUR	Minocycline, Chloroquine, Alteplase	yersinia_enterocolitica_p60_bc, ehrlichia_chaffeensis_wakulla, shigella_dysenteriae, escherichia_coli
42	48	5	MMP13, CHKA, CFTR, SLC12A4, TUBB3, CYP1B1, GCH1, ISG20, SAT1, PDE10A, CXCL10, BRAF, P4HA1, NFKB1, PTGER4, XDH, JAK2, SLC22A4, PPARG, B4GALT4, SERPINE1, F3, GLDC, IL1R1, CKB, SMOX, CCL20, UAP1, CCL2, PLEKHA4, CD40, LPL, TNFRSF1B, SERPINB2, SLC16A1, CD55, TXNRD1, FGF2, CHD1, OXTR, TAP1, NP, BMP2, IL6, PTGS2, P4HA2, FLT1, PLAUR	P4HA1, SERPINE1, PTGS2, CD55, PLAUR	Vitamin C, Alteplase, Salicylate-sodium, Antipyrine, Diclofenac, Piroxicam, Ketorolac, Aminosalicylic Acid, Flurbiprofen, Nepafenac, Chloramphenicol, Alteplase	yersinia_enterocolitica_wap_bc, yersinia_enterocolitica_p60_bl6, pseudomonas_aeruginosa_fdr440
44	3	0	ISG20, TAP1, CD40			yersinia_enterocolitica_wap_bl6, helicobacter_pylori_kx1_mgep, yersinia_enterocolitica_p60_bl6, listeria_monocytogenes, bifidobacterium_bifidum, ehrlichia_chaffeensis_liberty, ehrlichia_chaffeensis_wakulla, pseudomonas_aeruginosa_fdr440
46	30	6	CKB, JUN, PLAT, CD40, PROCR, HCK, IL3RA, CYP1B1, NNMT, ALDOA, AMPD3, ISG20, GPR18, CD55, S100A11, C1QB, SLC16A3, FPR1, CCL8, THBD, TAP1, LTB, FCER1G, CSF2RA, TNFRSF1A, IL6, IL1B, TLR2, TNF, PLAUR	C1QB, IL1B, FPR1, CD55, TNF, PLAUR	Palivizumab, Minocycline, Nedocromil, Chloramphenicol, Chloroquine, Alteplase	ehrlichia_chaffeensis_arkansa, ehrlichia_chaffeensis_wakulla, listeria_monocytogenes, pseudomonas_aeruginosa
48	4	1	IL6, IL1B, CD40, CXCL10	IL1B	Minocycline	yersinia_enterocolitica_wap_bc, yersinia_enterocolitica_p60_bc, lactobacillus_acidophilus, listeria_monocytogenes, bifidobacterium_bifidum, brucella_ovis, ehrlichia_chaffeensis_arkansa, ehrlichia_chaffeensis_wakulla, pseudomonas_aeruginosa_fdr440, brucella_melitensis, mycobacterium_tuberculosis, brucella_neotomae, escherichia_coli
50	37	7	MMP13, TLR7, CD44, SLC7A11, GCH1, ISG20, CXCL10, BRAF, NFKB1, XDH, JAK2, ABCC1, GSK3B, F3, IL1R1, PLA2G4A, SMOX, JUN, CCL2, CD40, TNFRSF1B, GLA, AMPD3, CCL5, PIM1, CDK6, CHD1, DDX6, SLC6A8, TAP1, TOP1, IL6, SLC7A2, PTGS2, MAPKAPK2, TNF, PLAUR	TLR7, SLC7A2, PTGS2, CD44, TOP1, TNF, PLAUR	Imiquimod, Hydroxychloroquine, L-Ornithine, Salicylate-sodium, Antipyrine, Diclofenac, Piroxicam, Ketorolac, Aminosalicylic Acid, Flurbiprofen, Nepafenac, Hyaluronan, Sodium stibogluconate, Chloroquine, Alteplase	yersinia_enterocolitica_wap_bl6, yersinia_enterocolitica_wap_bc, helicobacter_pylori_kx1_mgep
54	25	8	PPARD, CCL20, PDE4B, JUN, CCL2, MDM2, TNFRSF1B, SAT1, NFKB1, GPRC5A, SLC16A3, PPIF, JAK2, WARS, SLC6A8, IL6, HRH1, PTGS2, CLK1, ICAM1, ADH1A, IL1R1, PDE4A, TNF, PLAUR	PDE4B, HRH1, PTGS2, ADH1A, ICAM1, PDE4A, PLAUR, TNF	Ketotifen, Azelastine, Ketotifen, Olopatadine, Epinastine, Levocabastine, Emedastine, Salicylate-sodium, Antipyrine, Diclofenac, Piroxicam, Ketorolac, Aminosalicylic Acid, Flurbiprofen, Nepafenac, Ethanol, Hyaluronan, Ketotifen, Alteplase, Chloroquine	helicobacter_pylori_kx1_mgep, mycobacterium_tuberculosis, shigella_dysenteriae
56	32	6	TLR7, CYP1B1, SLC7A11, GFPT2, GCH1, ISG20, SAT1, CXCL10, P4HA1, NFKB1, GLRX, IL1B, CASP1, PLA2G4A, PGF, CCL20, SMOX, JUN, CD40, GLA, SERPINB2, TNFRSF1B, FABP3, PIM1, TXNRD1, IL12B, NP, TAP1, IL6, PTGS2, HSPA1A, TNF	P4HA1, TLR7, PTGS2, IL1B, CASP1, TNF	Vitamin C, Imiquimod, Hydroxychloroquine, Salicylate-sodium, Antipyrine, Diclofenac, Piroxicam, Ketorolac, Aminosalicylic Acid, Flurbiprofen, Nepafenac, Minocycline, Minocycline, Chloroquine	yersinia_enterocolitica_p60_bc, listeria_monocytogenes, bifidobacterium_bifidum
58	6	2	NFKB1, IL6, PTGS2, GCH1, ISG20, PLAUR	PTGS2, PLAUR	Salicylate-sodium, Antipyrine, Diclofenac, Piroxicam, Ketorolac, Aminosalicylic Acid, Flurbiprofen, Nepafenac, Alteplase	yersinia_enterocolitica_wap_bl6, yersinia_enterocolitica_p60_bc, pseudomonas_aeruginosa_fdr440, streptococcus_pneumoniae_g54, listeria_monocytogenes, mycobacterium_tuberculosis, helicobacter_pylori_kx2_mgep
60	28	7	PLA2G4A, CD44, CCL2, CD40, TNFRSF1B, HCK, CD80, VCAM1, CYP1B1, ISG20, CCL5, SAT1, CXCL10, PTPN1, SELP, ABCC1, JAK2, WARS, TAP1, SLC7A2, IL6, PTGS2, SELE, ICAM1, TLR2, IL1R1, TNF, PLAUR	SLC7A2, SELP, PTGS2, ICAM1, CD44, TNF, PLAUR	L-Ornithine, Heparin, Salicylate-sodium, Antipyrine, Diclofenac, Piroxicam, Ketorolac, Aminosalicylic Acid, Flurbiprofen, Nepafenac, Hyaluronan, Hyaluronan, Chloroquine, Alteplase	helicobacter_pylori_kx1_mgep, ehrlichia_chaffeensis_arkansa, escherichia_coli
62	39	8	TPO, HCK, GCH1, ISG20, IGFBP3, SAT1, CXCL10, CFB, NFKB1, JAK2, CCL8, HRH1, IL1B, CASP1, ICAM1, PLA2G4A, GCLM, CCL20, CCL2, CD40, TNFRSF1B, CD80, CASP7, IL3RA, CCL5, PIM1, TXNRD1, S100A11, STAT1, IL12B, LEPREL1, WARS, TAP1, IFNGR2, IL2RG, GMPR, IL6, PTGS2, PLAUR	GCLM, LEPREL1, HRH1, IL1B, PTGS2, CASP1, ICAM1, PLAUR	L-Cysteine, Vitamin C, Azelastine, Ketotifen, Olopatadine, Epinastine, Levocabastine, Emedastine, Minocycline, Salicylate-sodium, Antipyrine, Diclofenac, Piroxicam, Ketorolac, Aminosalicylic Acid, Flurbiprofen, Nepafenac, Minocycline, Hyaluronan, Alteplase	streptococcus_pyogenes, mycobacterium_tuberculosis, escherichia_coli
64	21	5	PLA2G4A, SMOX, CCL20, CCL2, CD40, TNFRSF1B, SERPINB2, CYP1B1, ISG20, SAT1, CD55, CXCL10, IL2RB, JAK2, TAP1, PDGFRA, IL6, IL1B, PTGS2, CASP1, PLAUR	PTGS2, IL1B, CASP1, CD55, PLAUR	Salicylate-sodium, Antipyrine, Diclofenac, Piroxicam, Ketorolac, Aminosalicylic Acid, Flurbiprofen, Nepafenac, Minocycline, Minocycline, Chloramphenicol, Alteplase	ehrlichia_chaffeensis_arkansa, yersinia_enterocolitica_p60_bc, pseudomonas_aeruginosa_fdr440
66	7	1	ISG20, TAP1, CD40, TNFRSF1B, CXCL10, TNF, HSPA1A	TNF	Chloroquine	yersinia_enterocolitica_wap_bl6, ehrlichia_chaffeensis_arkansa, yersinia_enterocolitica_p60_bl6, yersinia_enterocolitica_p60_bc, bifidobacterium_bifidum, aeromonas_cavia, escherichia_coli
68	6	1	TLR7, IL6, CCL5, CCL2, CD40, CXCL10	TLR7	Imiquimod, Hydroxychloroquine	yersinia_enterocolitica_wap_bl6, helicobacter_pylori_kx1_mgep, yersinia_enterocolitica_p60_bc, lactobacillus_acidophilus, ehrlichia_chaffeensis_arkansa, ehrlichia_chaffeensis_wakulla, bacillus_anthracis, helicobacter_pylori_kx2_mgep
70	6	3	NFKB1, IL6, PTGS2, TNF, PLAUR, HSPA1A	PTGS2, TNF, PLAUR	Salicylate-sodium, Antipyrine, Diclofenac, Piroxicam, Ketorolac, Aminosalicylic Acid, Flurbiprofen, Nepafenac, Chloroquine, Alteplase	yersinia_enterocolitica_wap_bl6, yersinia_enterocolitica_wap_bc, listeria_monocytogenes, pseudomonas_aeruginosa, bacillus_anthracis, mycobacterium_tuberculosis, escherichia_coli, shigella_dysenteriae
72	56	12	MMP13, PPARD, CTSD, HCK, DHRS3, GCH1, DAPP1, ISG20, IGFBP3, SAT1, TGM2, CXCL10, P4HA1, NFKB1, PTGER4, JAK2, SAA1, COL1A2, KYNU, IL1B, SLCO2B1, ICAM1, CASP1, IL1R1, PLA2G4A, RXRG, CCL20, PKM2, PDE4B, LDLR, PLEKHA4, CCL2, CD40, LPL, TNFRSF1B, CASP7, CCND1, PLAU, ALDH1A3, ADORA2B, TXNRD1, LRP1, APOE, COL6A1, TAP1, IFNGR2, CTSS, GMPR, KCNN4, IL6, PTGS2, P4HA2, IL8, PDE4A, PLAUR, GPX3	P4HA1, PDE4B, DHRS3, KCNN4, PTGS2, IL1B, PDE8A, ALDH1A3, CASP1, ICAM1, PDE4A, PLAUR	Vitamin C, Ketotifen, Vitamin A, Quinine, Miconazole, Clotrimazole, Salicylate-sodium, Antipyrine, Diclofenac, Piroxicam, Ketorolac, Aminosalicylic Acid, Flurbiprofen, Nepafenac, Minocycline, Vitamin A, Minocycline, Hyaluronan, Ketotifen, Alteplase	pseudomonas_aeruginosa_fdr440, mycobacterium_tuberculosis
74	2	1	NFKB1, PTGS2	PTGS2	Salicylate-sodium, Antipyrine, Diclofenac, Piroxicam, Ketorolac, Aminosalicylic Acid, Flurbiprofen, Nepafenac	yersinia_enterocolitica_wap_bc, helicobacter_pylori_kx1_mgep, lactobacillus_acidophilus, bifidobacterium_bifidum, pseudomonas_aeruginosa_fdr440, streptococcus_pneumoniae_g54, escherichia_coli, shigella_dysenteriae
76	20	5	TLR7, CD40, TNFRSF1B, PROCR, HCK, CD80, SLC7A11, ISG20, SAT1, CXCL10, C1QB, STAT1, JAK2, WARS, CCL8, TAP1, CTSS, IL1B, CASP1, TNF	TLR7, C1QB, IL1B, CASP1, TNF	Imiquimod, Hydroxychloroquine, Palivizumab, Minocycline, Minocycline, Chloroquine	ehrlichia_chaffeensis_arkansa, ehrlichia_chaffeensis_wakulla, listeria_monocytogenes, mycobacterium_tuberculosis, aeromonas_cavia
78	17	5	PPARD, TNFRSF1B, BCAT1, CYP1B1, PUM1, SAT1, NFKB1, GPRC5A, CCL8, WARS, THBD, IL6, HRH1, CLK1, PTGS2, ICAM1, PLAUR	HRH1, PTGS2, PDE8A, ICAM1, PLAUR	Azelastine, Ketotifen, Olopatadine, Epinastine, Levocabastine, Emedastine, Salicylate-sodium, Antipyrine, Diclofenac, Piroxicam, Ketorolac, Aminosalicylic Acid, Flurbiprofen, Nepafenac, Hyaluronan, Alteplase	streptococcus_pneumoniae_g54, helicobacter_pylori_kx2_mgep, shigella_dysenteriae
82	13	3	P4HA1, PTGER4, CCL20, JUN, HMOX1, SLC6A8, MDM2, IL6, PTGS2, UGCG, SAT1, PIM1, PLAUR	P4HA1, PTGS2, PLAUR	Vitamin C, Salicylate-sodium, Antipyrine, Diclofenac, Piroxicam, Ketorolac, Aminosalicylic Acid, Flurbiprofen, Nepafenac, Alteplase	yersinia_enterocolitica_p60_bl6, mycobacterium_tuberculosis, streptococcus_pneumoniae_tigr4
84	10	3	P4HA1, SLC16A3, SELP, CTSD, CCL20, JUN, IL6, PIM1, SAT1, PLAUR	P4HA1, SELP, PLAUR	Vitamin C, Heparin, Alteplase	helicobacter_pylori_kx1_mgep, ehrlichia_chaffeensis_wakulla, streptococcus_pneumoniae_tigr4
86	12	1	NFKB1, MMP13, CCL20, CCL2, TAP1, IL6, PTGS2, GCH1, CCL5, ISG20, PIM1, CXCL10	PTGS2	Salicylate-sodium, Antipyrine, Diclofenac, Piroxicam, Ketorolac, Aminosalicylic Acid, Flurbiprofen, Nepafenac	yersinia_enterocolitica_wap_bc, helicobacter_pylori_kx1_mgep, yersinia_enterocolitica_p60_bl6, yersinia_enterocolitica_p60_bc, mycobacterium_tuberculosis, helicobacter_pylori_kx1_npgec, escherichia_coli
88	2	1	CCL2, PLAUR	PLAUR	Alteplase	yersinia_enterocolitica_wap_bl6, yersinia_enterocolitica_wap_bc, yersinia_enterocolitica_p60_bl6, yersinia_enterocolitica_p60_bc, porphyromonas_gingivalis, ehrlichia_chaffeensis_liberty, ehrlichia_chaffeensis_arkansa, ehrlichia_chaffeensis_wakulla, escherichia_coli
90	18	3	TLR7, SMOX, CCL20, PDE4B, CD40, TNFRSF1B, SERPINB2, GLA, SLC7A11, GCH1, ISG20, SAT1, PIM1, CXCL10, NFKB1, DDX6, IL6, PTGS2	TLR7, PTGS2, PDE4B	Imiquimod, Hydroxychloroquine, Salicylate-sodium, Antipyrine, Diclofenac, Piroxicam, Ketorolac, Aminosalicylic Acid, Flurbiprofen, Nepafenac, Ketotifen	yersinia_enterocolitica_wap_bc, lactobacillus_acidophilus, listeria_monocytogenes, helicobacter_pylori_kx2_mgep
92	12	4	SMOX, CCL20, PDE4B, JUN, MDM2, DDX6, BMP2, IL6, PTGS2, F3, CD55, PLAUR	PTGS2, PDE4B, CD55, PLAUR	Salicylate-sodium, Antipyrine, Diclofenac, Piroxicam, Ketorolac, Aminosalicylic Acid, Flurbiprofen, Nepafenac, Ketotifen, Chloramphenicol, Alteplase	yersinia_enterocolitica_wap_bc, pseudomonas_aeruginosa, streptococcus_pneumoniae_tigr4
94	36	8	LGALS3, CYP1B1, ISG20, EDNRB, SAT1, CD86, P2RY2, ABCC1, CCL8, NQO1, PDGFRA, SERPINE1, ICAM1, CASP1, IL1R1, ALAS1, ABCG1, PLA2G4A, HEXB, TNFRSF1B, SERPINB2, SLC1A3, ADRBK2, HPSE, ADCY7, CD55, STAT1, SELP, HMOX1, IFNGR1, TAP1, THBD, GJA1, ADRB2, TLR2, PLAUR	ADRB2, SELP, SERPINE1, ICAM1, CASP1, CD55, P2RY2, PLAUR	Betaxolol, Carteolol, Timolol, Dipivefrin, Levobunolol, Metipranolol, Epinephrine, Heparin, Alteplase, Hyaluronan, Minocycline, Chloramphenicol, Suramin, Alteplase	ehrlichia_chaffeensis_arkansa, streptococcus_pneumoniae_g54, ehrlichia_chaffeensis_liberty
96	8	1	NFKB1, CCL20, CCL2, TAP1, CD40, IL6, ISG20, PLAUR	PLAUR	Alteplase	yersinia_enterocolitica_p60_bl6, yersinia_enterocolitica_p60_bc, ehrlichia_chaffeensis_wakulla, pseudomonas_aeruginosa_fdr440, streptococcus_pyogenes, pseudomonas_aeruginosa, escherichia_coli
98	6	2	NFKB1, CCL20, PTGS2, SAT1, CD40, PLAUR	PTGS2, PLAUR	Salicylate-sodium, Antipyrine, Diclofenac, Piroxicam, Ketorolac, Aminosalicylic Acid, Flurbiprofen, Nepafenac, Alteplase	helicobacter_pylori_kx1_mgep, burkholderia_pseudomallei, listeria_monocytogenes, mycobacterium_tuberculosis, helicobacter_pylori_kx2_mgep, escherichia_coli
102	5	0	NFKB1, CCL20, JUN, CCL2, CD40			yersinia_enterocolitica_wap_bc, burkholderia_pseudomallei, yersinia_enterocolitica_p60_bl6, yersinia_enterocolitica_p60_bc, ehrlichia_chaffeensis_wakulla, pseudomonas_aeruginosa, helicobacter_pylori_kx2_mgep
106	2	1	ISG20, PLAUR	PLAUR	Alteplase	yersinia_enterocolitica_wap_bc, helicobacter_pylori_kx1_mgep, yersinia_enterocolitica_p60_bl6, listeria_monocytogenes, ehrlichia_chaffeensis_liberty, ehrlichia_chaffeensis_arkansa, ehrlichia_chaffeensis_wakulla, streptococcus_pneumoniae_g54, streptococcus_pyogenes, mycobacterium_tuberculosis, helicobacter_pylori_kx2_mgep, escherichia_coli
110	4	3	IL6, PTGS2, PDE4B, PLAUR	PTGS2, PDE4B, PLAUR	Salicylate-sodium, Antipyrine, Diclofenac, Piroxicam, Ketorolac, Aminosalicylic Acid, Flurbiprofen, Nepafenac, Ketotifen, Alteplase	pseudomonas_aeruginosa_fdr440, mycobacterium_tuberculosis, helicobacter_pylori_kx2_mgep, brucella_neotomae, streptococcus_pneumoniae_tigr4, shigella_dysenteriae, escherichia_coli
114	6	0	NFKB1, IL6, CCL20, ISG20, CCL5, CCL2			ehrlichia_chaffeensis_wakulla, lactobacillus_acidophilus, bifidobacterium_bifidum, pseudomonas_aeruginosa, mycobacterium_tuberculosis, helicobacter_pylori_kx2_mgep, helicobacter_pylori_kx1_npgec
118	3	0	IL6, TAP1, CXCL10			yersinia_enterocolitica_wap_bl6, yersinia_enterocolitica_wap_bc, yersinia_enterocolitica_p60_bl6, yersinia_enterocolitica_p60_bc, lactobacillus_acidophilus, listeria_monocytogenes, bifidobacterium_bifidum, helicobacter_pylori_kx1_npgec, aggregatibacter_actinomycetemcomitans, ehrlichia_chaffeensis_arkansa, ehrlichia_chaffeensis_wakulla, mycobacterium_tuberculosis
122	20	6	BCL2, CD44, CCL2, CD40, TNFRSF1B, SLC7A11, CCL5, ISG20, PIM1, TXNRD1, CXCL10, NFKB1, TOP1, IFNB1, IL6, SLC7A2, F3, PTGS2, TNF, PLAUR	SLC7A2, PTGS2, CD44, TOP1, TNF, PLAUR	L-Ornithine, Salicylate-sodium, Antipyrine, Diclofenac, Piroxicam, Ketorolac, Aminosalicylic Acid, Flurbiprofen, Nepafenac, Hyaluronan, Sodium stibogluconate, Chloroquine, Alteplase	yersinia_enterocolitica_wap_bl6, yersinia_enterocolitica_p60_bc, brucella_melitensis, escherichia_coli
126	8	4	NFKB1, PDE4B, CCL2, CD40, IL6, PTGS2, ICAM1, PLAUR	PTGS2, PDE4B, ICAM1, PLAUR	Salicylate-sodium, Antipyrine, Diclofenac, Piroxicam, Ketorolac, Aminosalicylic Acid, Flurbiprofen, Nepafenac, Ketotifen, Hyaluronan, Alteplase	helicobacter_pylori_kx1_mgep, pseudomonas_aeruginosa, brucella_ovis, bacillus_anthracis, brucella_melitensis, pseudomonas_aeruginosa_fdr440, helicobacter_pylori_kx2_mgep, escherichia_coli
130	17	3	CCL2, CD40, TNFRSF1B, IL3RA, CCL5, CD52, ISG20, PIM1, CD86, CXCL10, NFKB1, PTGER4, MMP9, TAP1, IL6, PLAUR, TNF	MMP9, TNF, PLAUR	Minocycline, Chloroquine, Alteplase	yersinia_enterocolitica_wap_bl6, yersinia_enterocolitica_p60_bl6, ehrlichia_chaffeensis_wakulla, mycobacterium_tuberculosis, brucella_ovis
134	2	1	CD40, TNF	TNF	Chloroquine	yersinia_enterocolitica_wap_bc, yersinia_enterocolitica_p60_bl6, yersinia_enterocolitica_p60_bc, lactobacillus_acidophilus, listeria_monocytogenes, bifidobacterium_bifidum, ehrlichia_chaffeensis_liberty, ehrlichia_chaffeensis_arkansa, ehrlichia_chaffeensis_wakulla, mycobacterium_tuberculosis, escherichia_coli, helicobacter_pylori
136	9	2	NFKB1, LCN2, PLAT, TAP1, IL6, AMPD3, ISG20, CD55, PLAUR	CD55, PLAUR	Chloramphenicol, Alteplase	yersinia_enterocolitica_wap_bl6, ehrlichia_chaffeensis_wakulla, streptococcus_pneumoniae_g54, pseudomonas_aeruginosa
144	17	3	PLA2G4A, NFKB1, TLR7, IL12B, CCL20, JUN, CCL2, TAP1, CD40, GJA1, IL6, IL1B, CCL5, SAT1, PIM1, CXCL10, TNF	TLR7, IL1B, TNF	Imiquimod, Hydroxychloroquine, Minocycline, Chloroquine	yersinia_enterocolitica_wap_bc, ehrlichia_chaffeensis_wakulla, bacillus_anthracis, bifidobacterium_bifidum
146	6	0	ISG20, TAP1, SAT1, CD40, TNFRSF1B, CXCL10			yersinia_enterocolitica_wap_bc, helicobacter_pylori_kx1_mgep, lactobacillus_acidophilus, bifidobacterium_bifidum, aeromonas_cavia, ehrlichia_chaffeensis_wakulla, pseudomonas_aeruginosa_fdr440, escherichia_coli
154	5	3	CYP1B1, IL1B, CCL2, TNF, PLAUR	IL1B, TNF, PLAUR	Minocycline, Chloroquine, Alteplase	yersinia_enterocolitica_wap_bc, ehrlichia_chaffeensis_arkansa, ehrlichia_chaffeensis_wakulla, pseudomonas_aeruginosa, brucella_neotomae, shigella_dysenteriae, ehrlichia_chaffeensis_liberty
156	2	1	IL6, PTGS2	PTGS2	Salicylate-sodium, Antipyrine, Diclofenac, Piroxicam, Ketorolac, Aminosalicylic Acid, Flurbiprofen, Nepafenac	yersinia_enterocolitica_wap_bc, helicobacter_pylori_kx1_mgep, yersinia_enterocolitica_p60_bl6, listeria_monocytogenes, bifidobacterium_bifidum, pseudomonas_aeruginosa, porphyromonas_gingivalis, streptococcus_pneumoniae_tigr4, helicobacter_pylori_kx2_mgep, escherichia_coli
160	11	1	NFKB1, CCL2, CD40, TNFRSF1B, IL6, PTGS2, GCH1, CCL5, ISG20, PIM1, CXCL10	PTGS2	Salicylate-sodium, Antipyrine, Diclofenac, Piroxicam, Ketorolac, Aminosalicylic Acid, Flurbiprofen, Nepafenac	yersinia_enterocolitica_wap_bl6, yersinia_enterocolitica_wap_bc, bifidobacterium_bifidum, streptococcus_pyogenes, helicobacter_pylori_kx2_mgep
164	8	2	IL3RA, PTGS2, JUN, EDNRB, CCL2, CD40, IL1R1, TNF	PTGS2, TNF	Salicylate-sodium, Antipyrine, Diclofenac, Piroxicam, Ketorolac, Aminosalicylic Acid, Flurbiprofen, Nepafenac, Chloroquine	yersinia_enterocolitica_wap_bl6, yersinia_enterocolitica_wap_bc, ehrlichia_chaffeensis_arkansa, burkholderia_pseudomallei, mycobacterium_tuberculosis
170	3	1	IL6, PIM1, PLAUR	PLAUR	Alteplase	ehrlichia_chaffeensis_wakulla, bacillus_anthracis, streptococcus_pneumoniae_g54, listeria_monocytogenes, streptococcus_pneumoniae_tigr4, escherichia_coli
172	0	0				yersinia_enterocolitica_wap_bl6, yersinia_enterocolitica_wap_bc, helicobacter_pylori_kx2_npgec, helicobacter_pylori_kx1_mgep, yersinia_enterocolitica_p60_bl6, yersinia_enterocolitica_p60_bc, listeria_monocytogenes, pseudomonas_aeruginosa, streptococcus_pneumoniae_tigr4, helicobacter_pylori_kx1_npgec, ehrlichia_chaffeensis_wakulla, pseudomonas_aeruginosa_fdr440, streptococcus_pneumoniae_g54, helic…
178	3	2	NFKB1, PTGS2, PLAUR	PTGS2, PLAUR	Salicylate-sodium, Antipyrine, Diclofenac, Piroxicam, Ketorolac, Aminosalicylic Acid, Flurbiprofen, Nepafenac, Alteplase	yersinia_enterocolitica_wap_bc, yersinia_enterocolitica_p60_bl6, yersinia_enterocolitica_p60_bc, brucella_melitensis, streptococcus_pneumoniae_g54, mycobacterium_tuberculosis, shigella_dysenteriae
180	4	1	IL6, IL1B, SAT1, TNFRSF1B	IL1B	Minocycline	ehrlichia_chaffeensis_arkansa, ehrlichia_chaffeensis_wakulla, lactobacillus_acidophilus, pseudomonas_aeruginosa_fdr440, listeria_monocytogenes, streptococcus_pyogenes, shigella_dysenteriae
186	4	1	NFKB1, PTGS2, HMOX1, GLA	PTGS2	Salicylate-sodium, Antipyrine, Diclofenac, Piroxicam, Ketorolac, Aminosalicylic Acid, Flurbiprofen, Nepafenac	yersinia_enterocolitica_wap_bl6, burkholderia_pseudomallei, yersinia_enterocolitica_p60_bl6, lactobacillus_acidophilus, streptococcus_pneumoniae_g54, listeria_monocytogenes, bifidobacterium_bifidum
188	1	1	PLAUR	PLAUR	Alteplase	yersinia_enterocolitica_wap_bc, helicobacter_pylori_kx1_mgep, yersinia_enterocolitica_p60_bc, pseudomonas_aeruginosa, streptococcus_pneumoniae_d39, ehrlichia_chaffeensis_arkansa, ehrlichia_chaffeensis_wakulla, mycobacterium_tuberculosis, helicobacter_pylori_kx2_mgep, escherichia_coli, shigella_dysenteriae
194	4	0	ISG20, TAP1, PIM1, CXCL10			yersinia_enterocolitica_wap_bl6, yersinia_enterocolitica_wap_bc, yersinia_enterocolitica_p60_bl6, yersinia_enterocolitica_p60_bc, lactobacillus_acidophilus, brucella_ovis, aeromonas_cavia, helicobacter_pylori_kx1_npgec, streptococcus_pyogenes
196	3	2	IL6, PTGS2, PLAUR	PTGS2, PLAUR	Salicylate-sodium, Antipyrine, Diclofenac, Piroxicam, Ketorolac, Aminosalicylic Acid, Flurbiprofen, Nepafenac, Alteplase	yersinia_enterocolitica_wap_bl6, yersinia_enterocolitica_wap_bc, yersinia_enterocolitica_p60_bc, pseudomonas_aeruginosa_fdr440, brucella_ovis, streptococcus_pneumoniae_tigr4
198	7	1	IL6, IL12B, PTGS2, CCL2, PIM1, CD86, TNFRSF1B	PTGS2	Salicylate-sodium, Antipyrine, Diclofenac, Piroxicam, Ketorolac, Aminosalicylic Acid, Flurbiprofen, Nepafenac	yersinia_enterocolitica_wap_bl6, yersinia_enterocolitica_p60_bc, lactobacillus_acidophilus, bifidobacterium_bifidum, porphyromonas_gingivalis, mycobacterium_tuberculosis
202	2	0	ISG20, CD40			helicobacter_pylori_kx1_mgep, lactobacillus_acidophilus, listeria_monocytogenes, pseudomonas_aeruginosa, aeromonas_cavia, mycobacterium_tuberculosis, streptococcus_pyogenes, helicobacter_pylori_kx2_mgep
206	8	3	NFKB1, IL6, GCH1, IL1B, PTGS2, PIM1, CXCL10, PLAUR	PTGS2, IL1B, PLAUR	Salicylate-sodium, Antipyrine, Diclofenac, Piroxicam, Ketorolac, Aminosalicylic Acid, Flurbiprofen, Nepafenac, Minocycline, Alteplase	yersinia_enterocolitica_wap_bc, yersinia_enterocolitica_p60_bc, bacillus_anthracis, listeria_monocytogenes, streptococcus_pyogenes, brucella_neotomae, escherichia_coli
210	3	1	ICAM1, CCL2, CD40	ICAM1	Hyaluronan	helicobacter_pylori_kx1_mgep, ehrlichia_chaffeensis_arkansa, burkholderia_pseudomallei, ehrlichia_chaffeensis_wakulla, lactobacillus_acidophilus, pseudomonas_aeruginosa_fdr440, brucella_neotomae, escherichia_coli
212	2	0	ISG20, TAP1			yersinia_enterocolitica_wap_bc, yersinia_enterocolitica_p60_bc, streptococcus_pneumoniae_g54, listeria_monocytogenes, bifidobacterium_bifidum, helicobacter_pylori_kx1_npgec, ehrlichia_chaffeensis_liberty
214	1	0	CCL2			yersinia_enterocolitica_wap_bl6, yersinia_enterocolitica_wap_bc, helicobacter_pylori_kx1_mgep, yersinia_enterocolitica_p60_bl6, yersinia_enterocolitica_p60_bc, ehrlichia_chaffeensis_wakulla, pseudomonas_aeruginosa_fdr1, pseudomonas_aeruginosa_fdr440, mycobacterium_tuberculosis, helicobacter_pylori_kx2_mgep, escherichia_coli, shigella_dysenteriae
216	2	2	ICAM1, PLAUR	ICAM1, PLAUR	Hyaluronan, Alteplase	helicobacter_pylori_kx1_mgep, ehrlichia_chaffeensis_arkansa, ehrlichia_chaffeensis_wakulla, streptococcus_pneumoniae_g54, brucella_ovis, helicobacter_pylori_kx2_mgep, shigella_dysenteriae
222	2	2	PTGS2, PLAUR	PTGS2, PLAUR	Salicylate-sodium, Antipyrine, Diclofenac, Piroxicam, Ketorolac, Aminosalicylic Acid, Flurbiprofen, Nepafenac, Alteplase	yersinia_enterocolitica_wap_bc, burkholderia_pseudomallei, pseudomonas_aeruginosa, streptococcus_pneumoniae_tigr4, brucella_melitensis, pseudomonas_aeruginosa_fdr440, escherichia_coli, shigella_dysenteriae
224	1	0	PIM1			yersinia_enterocolitica_wap_bl6, yersinia_enterocolitica_wap_bc, yersinia_enterocolitica_p60_bl6, yersinia_enterocolitica_p60_bc, listeria_monocytogenes, aeromonas_cavia, streptococcus_pneumoniae_tigr4, ehrlichia_chaffeensis_wakulla, mycobacterium_tuberculosis, escherichia_coli
236	3	0	STAT1, ISG20, TAP1			lactobacillus_acidophilus, bifidobacterium_bifidum, aeromonas_cavia, ehrlichia_chaffeensis_arkansa, streptococcus_pneumoniae_g54, mycobacterium_tuberculosis, streptococcus_pyogenes, escherichia_coli
246	0	0				helicobacter_pylori_kx1_mgep, yersinia_enterocolitica_p60_bl6, bifidobacterium_bifidum, pseudomonas_aeruginosa, brucella_ovis, aggregatibacter_actinomycetemcomitans, ehrlichia_chaffeensis_arkansa, ehrlichia_chaffeensis_wakulla, pseudomonas_aeruginosa_fdr440, brucella_melitensis, streptococcus_pyogenes, helicobacter_pylori_kx2_mgep, yersinia_enterocolitica_wap_bl6, yersinia_enterocolitica_wap_bc, …
254	1	0	CCL2			yersinia_enterocolitica_wap_bl6, yersinia_enterocolitica_wap_bc, helicobacter_pylori_kx2_npgec, yersinia_enterocolitica_p60_bl6, yersinia_enterocolitica_p60_bc, lactobacillus_acidophilus, bifidobacterium_bifidum, ehrlichia_chaffeensis_liberty, ehrlichia_chaffeensis_arkansa, ehrlichia_chaffeensis_wakulla, bacillus_anthracis, escherichia_coli
290	2	1	IL6, PTGS2	PTGS2	Salicylate-sodium, Antipyrine, Diclofenac, Piroxicam, Ketorolac, Aminosalicylic Acid, Flurbiprofen, Nepafenac	yersinia_enterocolitica_wap_bl6, yersinia_enterocolitica_wap_bc, helicobacter_pylori_kx1_mgep, yersinia_enterocolitica_p60_bl6, yersinia_enterocolitica_p60_bc, lactobacillus_acidophilus, bifidobacterium_bifidum, brucella_ovis, streptococcus_pneumoniae_d39, brucella_melitensis, pseudomonas_aeruginosa_fdr440, brucella_neotomae, helicobacter_pylori_kx2_mgep, escherichia_coli
332	0	0				helicobacter_pylori_kx1_mgep, yersinia_enterocolitica_p60_bl6, pseudomonas_aeruginosa, brucella_ovis, ehrlichia_chaffeensis_arkansa, ehrlichia_chaffeensis_wakulla, mycobacterium_tuberculosis, helicobacter_pylori_kx2_mgep, yersinia_enterocolitica_wap_bl6, yersinia_enterocolitica_wap_bc, burkholderia_pseudomallei, yersinia_enterocolitica_p60_bc, lactobacillus_acidophilus, ehrlichia_chaffeensis_libe…
378	0	0				yersinia_enterocolitica_wap_bc, helicobacter_pylori_kx1_mgep, yersinia_enterocolitica_p60_bl6, lactobacillus_acidophilus, bifidobacterium_bifidum, pseudomonas_aeruginosa, ehrlichia_chaffeensis_liberty, ehrlichia_chaffeensis_arkansa, ehrlichia_chaffeensis_wakulla, pseudomonas_aeruginosa_fdr440, streptococcus_pneumoniae_g54, streptococcus_pyogenes, mycobacterium_tuberculosis, escherichia_coli, heli…
380	0	0				yersinia_enterocolitica_wap_bl6, yersinia_enterocolitica_wap_bc, helicobacter_pylori_kx1_mgep, yersinia_enterocolitica_p60_bl6, yersinia_enterocolitica_p60_bc, pseudomonas_aeruginosa, streptococcus_pneumoniae_tigr4, ehrlichia_chaffeensis_arkansa, streptococcus_gordonii, ehrlichia_chaffeensis_wakulla, streptococcus_pneumoniae_g54, mycobacterium_tuberculosis, helicobacter_pylori_kx2_mgep, escherich…
386	1	1	PTGS2	PTGS2	Salicylate-sodium, Antipyrine, Diclofenac, Piroxicam, Ketorolac, Aminosalicylic Acid, Flurbiprofen, Nepafenac	yersinia_enterocolitica_wap_bl6, yersinia_enterocolitica_wap_bc, helicobacter_pylori_kx2_npgec, helicobacter_pylori_kx1_mgep, burkholderia_pseudomallei, yersinia_enterocolitica_p60_bl6, yersinia_enterocolitica_p60_bc, streptococcus_pneumoniae_d39, helicobacter_pylori_kx1_npgec, bacillus_anthracis, mycobacterium_tuberculosis, helicobacter_pylori_kx2_mgep, escherichia_coli, shigella_dysenteriae
416	0	0				helicobacter_pylori_kx1_mgep, yersinia_enterocolitica_p60_bl6, listeria_monocytogenes, bifidobacterium_bifidum, pseudomonas_aeruginosa, streptococcus_pneumoniae_tigr4, ehrlichia_chaffeensis_arkansa, ehrlichia_chaffeensis_wakulla, pseudomonas_aeruginosa_fdr1, pseudomonas_aeruginosa_fdr440, brucella_melitensis, mycobacterium_tuberculosis, helicobacter_pylori_kx2_mgep, yersinia_enterocolitica_wap_bl…
452	0	0				helicobacter_pylori_kx1_mgep, yersinia_enterocolitica_p60_bl6, bifidobacterium_bifidum, pseudomonas_aeruginosa, porphyromonas_gingivalis, brucella_ovis, ehrlichia_chaffeensis_arkansa, ehrlichia_chaffeensis_wakulla, pseudomonas_aeruginosa_fdr440, brucella_melitensis, streptococcus_pyogenes, helicobacter_pylori_kx2_mgep, yersinia_enterocolitica_wap_bl6, yersinia_enterocolitica_wap_bc, yersinia_ente…
512	0	0				helicobacter_pylori_kx1_mgep, yersinia_enterocolitica_p60_bl6, bifidobacterium_bifidum, pseudomonas_aeruginosa, ehrlichia_chaffeensis_arkansa, ehrlichia_chaffeensis_wakulla, brucella_melitensis, streptococcus_pyogenes, helicobacter_pylori_kx2_mgep, yersinia_enterocolitica_wap_bl6, yersinia_enterocolitica_wap_bc, helicobacter_pylori_kx2_npgec, yersinia_enterocolitica_p60_bc, lactobacillus_acidophi…
540	0	0				helicobacter_pylori_kx1_mgep, yersinia_enterocolitica_p60_bl6, listeria_monocytogenes, pseudomonas_aeruginosa, streptococcus_pneumoniae_tigr4, ehrlichia_chaffeensis_arkansa, ehrlichia_chaffeensis_wakulla, pseudomonas_aeruginosa_fdr440, mycobacterium_tuberculosis, helicobacter_pylori_kx2_mgep, yersinia_enterocolitica_wap_bl6, yersinia_enterocolitica_wap_bc, yersinia_enterocolitica_p60_bc, lactobac…
